# Supplementary material for: Systematic review protocol examining the effectiveness of hospital clowns for symptom cluster management in paediatrics
Source: PubMed Central journal article supplement — BMJ Open. 2019 Jan 21;9(1):e026524. doi: 10.1136/bmjopen-2018-026524 (PMC6347896; doi:10.1136/bmjopen-2018-026524), 2019-01-21
Supplement: bmjopen-2018-026524.draft_revisions.pdf [file bmjopen-2018-026524.draft_revisions.pdf]

# BMJ Open

BMJ Open is committed to open peer review. As part of this commitment we make the peer review history of every article we publish publicly available.

When an article is published we post the peer reviewers' comments and the authors' responses online. We also post the versions of the paper that were used during peer review. These are the versions that the peer review comments apply to.

The versions of the paper that follow are the versions that were submitted during the peer review process. They are not the versions of record or the final published versions. They should not be cited or distributed as the published version of this manuscript.

BMJ Open is an open access journal and the full, final, typeset and author-corrected version of record of the manuscript is available on our site with no access controls, subscription charges or pay-per-view fees (<http://bmjopen.bmj.com>).

If you have any questions on BMJ Open's open peer review process please email [info.bmjopen@bmj.com](mailto:info.bmjopen@bmj.com)

# BMJ Open

## A SYSTEMATIC REVIEW PROTOCOL EXAMINING THE EFFECTIVENESS OF HOSPITAL CLOWNS FOR SYMPTOM CLUSTER MANAGEMENT IN PEDIATRICS

|                               |                                                                                                                                                                                                                                                                                                                                                                                                                                                                                                                                                                                                                                                                                                                                                                                                                                                                                                                                                                                                                                                |
|-------------------------------|------------------------------------------------------------------------------------------------------------------------------------------------------------------------------------------------------------------------------------------------------------------------------------------------------------------------------------------------------------------------------------------------------------------------------------------------------------------------------------------------------------------------------------------------------------------------------------------------------------------------------------------------------------------------------------------------------------------------------------------------------------------------------------------------------------------------------------------------------------------------------------------------------------------------------------------------------------------------------------------------------------------------------------------------|
| Journal:                      | <i>BMJ Open</i>                                                                                                                                                                                                                                                                                                                                                                                                                                                                                                                                                                                                                                                                                                                                                                                                                                                                                                                                                                                                                                |
| Manuscript ID                 | bmjopen-2018-026524                                                                                                                                                                                                                                                                                                                                                                                                                                                                                                                                                                                                                                                                                                                                                                                                                                                                                                                                                                                                                            |
| Article Type:                 | Protocol                                                                                                                                                                                                                                                                                                                                                                                                                                                                                                                                                                                                                                                                                                                                                                                                                                                                                                                                                                                                                                       |
| Date Submitted by the Author: | 06-Sep-2018                                                                                                                                                                                                                                                                                                                                                                                                                                                                                                                                                                                                                                                                                                                                                                                                                                                                                                                                                                                                                                    |
| Complete List of Authors:     | <p>LOPES-JÚNIOR, LUÍS CARLOS; Universidade de Sao Paulo Campus de Ribeirao Preto, Department Maternal-Infant Nursing and Public Health Lima, Regina Aparecida Garcia; Universidade de Sao Paulo Campus de Ribeirao Preto, Department of Maternal-Infant and Public Health Nursing Olson, Karin; University of Alberta, Faculty of Nursing Bomfim, Emiliana; University of Saskatchewan College of Medicine, Department of Medicine</p> <p>Neves, Eliane Tatsch; Universidade Federal de Santa Maria, Nursing Department</p> <p>Silveira, Denise Sayuri Calheiros da; Universidade de Sao Paulo Faculdade de Medicina de Ribeirao Preto, Department of Biochemistry and Immunology</p> <p>Nunes, Michelle Darezza Rodrigues; Faculdade de Enfermagem da UERJ, Nursing Department</p> <p>Nascimento, Lucila; University of São Paulo, Department of Maternal-Infant and Public Health Nursing</p> <p>Pereira-da-Silva, Gabriela; Universidade de Sao Paulo Campus de Ribeirao Preto, Department of Maternal-Infant and Public Health Nursing</p> |
| Keywords:                     | Clown intervention, Symptom management, Symptom clusters, Child, Adolescent, Pediatrics                                                                                                                                                                                                                                                                                                                                                                                                                                                                                                                                                                                                                                                                                                                                                                                                                                                                                                                                                        |

SCHOLARONE™  
Manuscripts

*Title Page – BMJ Open*

**A SYSTEMATIC REVIEW PROTOCOL EXAMINING THE EFFECTIVENESS OF HOSPITAL CLOWNS FOR SYMPTOM CLUSTER MANAGEMENT IN PEDIATRICS**

Luís C. Lopes-Júnior<sup>1</sup>, RN, PhD. E-mail: [luisgen@usp.br](mailto:luisgen@usp.br)  
Regina A. G. Lima<sup>1</sup>, RN, PhD. E-mail: [limare@eerp.usp.br](mailto:limare@eerp.usp.br)  
Karin Olson<sup>2</sup>, RN, PhD. E-mail: [kolson@ualberta.ca](mailto:kolson@ualberta.ca)  
Emiliana Bomfim<sup>3</sup>, RN, MSc. PhD candidate. E-mail: [e.bomfim@usask.ca](mailto:e.bomfim@usask.ca)  
Eliane T. Neves<sup>4</sup>, RN, PhD. E-mail: [elianeves03@gmail.com](mailto:elianeves03@gmail.com)  
Denise S. C. Silveira<sup>5</sup>, BS, PhD. E-mail: [denise\\_sayuri@usp.br](mailto:denise_sayuri@usp.br)  
Michelle D. R. Nunes<sup>6</sup>, RN, PhD. E-mail: [mid13@hotmail.com](mailto:mid13@hotmail.com)  
Lucila C. Nascimento<sup>1</sup>, RN, PhD. E-mail: [lucila@eerp.usp.br](mailto:lucila@eerp.usp.br)  
Gabriela Pereira-da-Silva<sup>1</sup>, BS, PhD. E-mail: [gbiisson@eerp.usp.br](mailto:gbiisson@eerp.usp.br)

**Affiliations and addresses:** <sup>1</sup>University of São Paulo at Ribeirão Preto College of Nursing, WHO Collaborating Centre for Nursing Research Development. Ribeirão Preto, SP, Brazil; <sup>2</sup>University of Alberta. Edmonton, AB, Canada; <sup>3</sup>University of Saskatchewan, College of Medicine. Saskatoon, SK, Canada; <sup>4</sup>Federal University of Santa Maria. Santa Maria, RS, Brazil; <sup>5</sup>University of São Paulo at Ribeirão Preto Medical School. Ribeirão Preto, SP, Brazil; and <sup>6</sup>Rio de Janeiro State University. Rio de Janeiro, RJ, Brazil.

**Corresponding author:** Luís C. Lopes-Júnior. Department of Maternal-Infant and Public Health Nursing, University of São Paulo at Ribeirão Preto College of Nursing, WHO Collaborating Centre for Nursing Research Development, Avenida dos Bandeirantes, 3900, Campus Universitário, Ribeirão Preto, SP, Brazil, 14040-902. [[luisgen@usp.br](mailto:luisgen@usp.br)], +5516981126357.

**Acknowledgements**

We would like to thank the Coordination of Improvement of Higher Education Personnel - CAPES, Brazil, for supporting this research with regular doctoral scholarship to Luís Carlos Lopes Júnior as well as his Doctoral Fellowship/Internship at the University of Alberta (UofA), Edmonton, Alberta, Canada, through the Doctoral “Sandwich” Program Abroad – PDSE/CAPES (Process N<sup>o</sup>: BEX 9321/14-4).

**Author Contributions:** LCLJ, RAGL and KO conceptualized and designed the protocol, drafted the initial manuscript, and reviewed the manuscript. LCLJ, EB and ETN defined the concepts and search items, data extraction process as well as methodological appraisal of the studies. DSCS and MDRN planned the data extraction and statistical analysis. LCN and GPS, provided critical insights. All authors have approved and contributed to the final written manuscript.

**Funding:** This research was funded by the Coordination for the Improvement of Higher Education Personnel (CAPES), Process number: BEX 9321/14-4.

**Data Statement section:** PROSPERO registration number: CRD42018107099. Available in: [https://www.crd.york.ac.uk/prospero/display\\_record.php?RecordID=107099](https://www.crd.york.ac.uk/prospero/display_record.php?RecordID=107099)

**Word Count:** 2058 words.

**Disclaimer:** The views of the authors do not necessarily reflect those of the NHS, NIHR or the Department of Health.

**Competing interests:** None declared.

**Patient consent:** Not required.

**Provenance and peer review:** Not commissioned; externally peer reviewed.

## ABSTRACT

**Introduction:** Clown intervention may playing an important complementary role in pediatric care and recovery. However, data on its utility for symptom cluster management of hospitalized children and adolescents in acute and chronic disorders are yet to be critically evaluated. As clinicians strive to minimize the psychological burden during hospitalization, it is important that they are aware of the scientific evidences available regarding clown intervention for symptom management. We aim to provide quality evidence for the effectiveness of clown intervention on symptom cluster management in pediatric inpatients, both in acute and chronic conditions.

**Methods and analysis:** A systematic review of randomized controlled trials (RCTs) and non-randomized controlled trials (NRCTs) will be conducted. MEDLINE, Web of Science, Cochrane Library, Science Direct, PsycINFO, CINAHL, LILACS and SciELO databases will be searched from January 2000 to December 2018. Primary outcomes will include measures related with the effect of clown intervention on symptom cluster of pediatric inpatients (anxiety, pain, stress, and psychological, emotional responses and perceived well-being). Study selection will follow the Preferred Reporting Items for Systematic Reviews and Meta-Analyses guidelines and the methodological appraisal of the studies will be assessed by the Jadad Scale as well as Cochrane Risk-of-Bias Tool for RCTs, and Risk-of-Bias In Non-Randomized Studies-ROBINS-I Tool for NRCTs. A narrative synthesis will be conducted for all included studies. Also, if sufficient data are available, a meta-analysis will be conducted. The effect sizes will be generated using Hedges' g score, for both fixed and random effect models.  $I^2$  statistics will be used to assess heterogeneity and identify their potential sources.

**Ethics and dissemination:** As it will be a systematic review, without human beings involvement, there will be no require for ethical approval. Findings will be disseminated widely through peer-reviewed publication and in various media, e.g. conferences, congresses or symposia.

**PROSPERO registration number:** CRD42018107099.

**Keywords:** Clown intervention; Symptom management; Symptom clusters; Child; Adolescent; Pediatrics.

### Strengths and limitations of this study:

- This protocol reduces the possibility of duplication, gives transparency to the methods and processes that will be used, reduces possible biases and allows peer review.
- Will offer highest level of evidence for informed decisions from this systematic review of randomised controlled trials as well as non-randomized controlled trials.
- This systematic review will be the first to explore the effectiveness of clown intervention for symptom cluster management of hospitalized children and adolescents in acute and chronic disorders.
- The scarcity of of randomised controlled trials undertaken with pediatric inpatients with chronic disorders, the publication bias and the methodological quality of the grey literature found may be the main limitations of the study.

# A SYSTEMATIC REVIEW PROTOCOL EXAMINING THE EFFECTIVENESS OF HOSPITAL CLOWNS FOR SYMPTOM CLUSTER MANAGEMENT IN PEDIATRICS

## INTRODUCTION

Illness produces stress, and well-being, self-confidence, and psychological processes that may regulate immune responses can be significant factors for recovery and response to treatment.<sup>1,2</sup> The procedures and treatments performed in hospital settings can further increase patient burden, especially for hospitalized children and adolescents, requiring specific strategies to help them cope with hospitalization, avoid stress-related disorders, and psychoneurological symptom clusters.<sup>2-7</sup> Therefore, alleviating psychoneurological symptom clusters caused by the hospitalization process has become of major interest in pediatric wards.<sup>8-17</sup> Since therapeutic clowning began in North America in 1986, it has become a popular practice in pediatric settings, mainly in acute and rehabilitation hospitals worldwide.<sup>18,19</sup> As clown intervention, a non-pharmacological approach, has been shown to have a positive effect in the outcomes of pediatric patients<sup>18-20</sup> it is increasingly thought to play an important complementary role in health care by easing the recovery of these patients.<sup>18,20</sup>

It has been shown that this intervention can enhance emotional and behavioral processes, for instance, improving well-being and self-confidence, and reducing stress and anxiety levels.<sup>21-29</sup> In addition, evidence suggests that hospital clowns help pediatric patients to better adapt to their hospital surroundings and can distract from, and demystify painful or frightening procedures through 'doses of fun' to complement traditional clinical interventions.<sup>18,24,27</sup> This hypothesis is supported by studies showing that clown intervention enhances emotional and behavioral responses.<sup>22,23</sup> Positive changes in emotional responses arising from humor and laughter have been correlated with increased pain thresholds and immunity, inversely correlated with stress hormone levels, and linked to positive health.<sup>22,23</sup> Despite this recognition, few studies have investigated the molecular mechanisms that mediate the positive health outcomes of clown intervention.<sup>30-33</sup>

Recently, two systematic reviews and meta-analyses looked at the effects of clown intervention in pediatric hospital settings.<sup>34,35</sup> One of them concluded that hospital clowns play a significant role in reducing stress and anxiety levels in children staying in a pediatric ward or undergoing invasive procedures or minor surgeries under anesthesia, as well as in their parents<sup>34</sup> and the other confirmed the strong effect of clown intervention in reducing children's pre-operative psychological distress.<sup>35</sup> However, both reviews focused solely on

1  
2  
3 acute situations. Furthermore, one of the reviews<sup>34</sup> looked at both randomized and non-  
4 randomized controlled trials, but lacked a specific tool for a bias analysis of the latter. Finally,  
5 both failed to investigate the effectiveness of clown intervention for a range of symptom  
6 clusters in hospitalized children and adolescents in depth. Hence, in this systematic review we  
7 evaluated evidence on the effectiveness of clown intervention for symptom clusters  
8 management in hospitalized children and adolescents in a variety of pediatric settings, both in  
9 acute and chronic conditions, from both randomized and nonrandomized controlled trials,  
10 assessing the quality of the latter with a recently developed tool, ROBINS-1.<sup>36</sup>

11  
12 This review will expand on the above-mentioned works, in order to identify recent  
13 methodological and scientific progress until December 2018. Following the Preferred  
14 Reporting Items for Systematic Reviews and Meta-Analyses Protocols (PRISMA-P) checklist  
15 as guidance,<sup>37</sup> we propose a systematic and reproducible strategy to query the literature about  
16 the effectiveness of clown intervention on symptom cluster management in pediatric  
17 inpatients.

## 28 **METHODS AND ANALYSIS**

### 30 **Search Strategy**

31  
32 The search strategy will be performed using resources that enhance methodological  
33 transparency and improve the reproducibility of the results and evidence synthesis. In this  
34 sense, the search strategy will be elaborated and implemented prior to study selection,  
35 according to the PRISMA-P checklist as guidance.<sup>37</sup> Additionally, using the PICOS strategy<sup>38</sup>  
36 we elaborated the guiding question of this review, in order to ensure the systematic search of  
37 available literature: *"What is the effect of clown intervention for symptom management in*  
38 *hospitalized children and adolescents?"* The PROSPERO – International Prospective Register  
39 of Systematic Reviews – registration number is: CRD42018107099  
40 ([https://www.crd.york.ac.uk/prospero/display\\_record.php?RecordID=107099](https://www.crd.york.ac.uk/prospero/display_record.php?RecordID=107099))

41  
42 Studies will be retrieved using eight databases: MEDLINE (via Pubmed), Web of  
43 Science, Cochrane Library, Science Direct, PsycINFO, CINAHL, LILACS and SciELO. In  
44 order to reflect contemporary practice, a search of the literature from the last 18 years  
45 (January 2000 to December 2018) will be performed. Language restrictions will be applied  
46 and only articles in English will be included. In addition, the reference section in the studies  
47 returned by the above search were scrutinized for additional relevant articles. It is noteworthy  
48 that two researchers (LCLJ and EOB) will performed the search strategy independently. Also,  
49  
50  
51  
52  
53  
54  
55  
56  
57  
58  
59

the bibliographic software EndNote (<https://www.myendnoteweb.com/>) will be used to store, organize, and manage all the references and ensure a systematic and comprehensive search.

Initially, the existence of controlled descriptors (such as MeSH terms, CINAHL headings, PsycINFO thesaurus, and DeCS-Health Science Descriptors) and their synonyms (key words) was verified in each database. The search terms were combined using the Boolean operators “AND” and “OR”.<sup>39</sup>

Subsequently, a search strategy combining MeSH terms and free-text words, such as: (child OR child, hospitalized OR adolescent OR adolescent, hospitalized OR pediatrics) AND (clown doctors OR clown intervention OR clowns OR therapeutic clown OR clowns in hospital) AND (symptoms OR affective symptoms OR behavioral symptoms OR clusters of neuropsychological symptoms OR neuropsychological symptoms OR anxiety OR stress, psychological OR distress OR psychological impact) was used. In order to locate the clinical trials, we added a filter after the PICOS search strategy that included the following terms: AND (randomized controlled trial OR randomized controlled trials as topic OR controlled clinical trial OR clinical trial OR nonrandomized controlled trials).

### Study selection criteria

A summary of the participants, interventions, comparators and outcomes considered, as well as the type of studies included according to PICOS strategy, is provided in Table 1.

**Table 1** Inclusion and exclusion criteria

| PICOS Strategy <sup>38</sup> | Inclusion criteria                                                                                                               | Exclusion criteria                                                                                                            |
|------------------------------|----------------------------------------------------------------------------------------------------------------------------------|-------------------------------------------------------------------------------------------------------------------------------|
| P – Population               | Hospitalized children and adolescents for acute conditions or chronic disorders.                                                 | Non-hospitalized children and adolescents as well as presence of <i>coulrophobia</i> .                                        |
| I – Intervention             | Clown intervention                                                                                                               |                                                                                                                               |
| C – Comparison               | Usual standard of care without receiving clown intervention.                                                                     |                                                                                                                               |
| O – Outcome                  | Any measure related to symptom clusters: anxiety, pain, stress, and psychological, emotional responses and perceived well-being. | Studies that do not report any symptom as primary outcome                                                                     |
| S – Study design             | Randomized controlled trial and nonrandomized controlled trials (quasi-experimental study).                                      | All the non-primary literature, such as reviews, dissertations, theses, editorials, protocol studies and clinical guidelines. |

### Screening and data extraction

Initial screening of studies will be based on the information contained in their titles and abstracts and will be conducted by two independent investigators (LCLJ and EOB). When the reviewers disagreed, the article will be reevaluated and, if the disagreement persisted, a



1  
2  
3 third reviewer (ETN) will make a final decision. Full-paper screening will be conducted by  
4 the same independent investigators. Cohen's kappa will be used to measure inter-coder  
5 agreement in each screening phase.  
6

7  
8 Data will be extracted using a previously proposed tool<sup>3</sup>, including four domains: i)  
9 identification of the study (article title; journal title; impact factor of the journal; authors;  
10 country of the study; language; publication year; host institution of the study [hospital;  
11 university; research center; single institution; multicenter study]); ii) methodological  
12 characteristics (study design; study objective or research question or hypothesis; sample  
13 characteristics, e.g. sample size, sex; age, race; acute and/or chronic diagnoses; groups and  
14 controls; stated length of follow-up; validated measures; statistical analyses, adjustments; iii)  
15 main findings; and iv) conclusions. If the outcome data in the original article were unclear,  
16 the corresponding author will be contacted via e-mail for clarification. For data extraction  
17 two independent Microsoft Excel spreadsheets will be elaborated for two reviewers (LCLJ and  
18 EOB) to summarize the data from the included studies. Then, the spreadsheets were combined  
19 into one. Disagreements will be resolved by a third investigator (ETN).  
20  
21  
22  
23  
24  
25  
26  
27

## 28 **Quality assessment**

29  
30 Methodological quality of the RCTs will be assessed using the Jadad scale,<sup>40</sup> a widely  
31 used tool for classification of the quality of the evidence from RCTs. The Jadad scale scores  
32 range from 0 to 5, with studies scoring < 3 considered as low quality, and studies that score ≥  
33 3 classified as high quality.<sup>40</sup> The internal validity and risk of bias for RCTs will be assessed  
34 with the appraisal tool from the Cochrane Handbook for Systematic Reviews of Interventions  
35 5.1.0,<sup>41</sup> which assesses the following study-level aspects: (1) randomisation sequence  
36 allocation; (2) allocation concealment; (3) blinding; (4) completeness of outcome data and (5)  
37 selective outcome reporting; and classifies studies into low, high or unclear risk of bias. For  
38 assessing NRCT, the Risk of Bias In Non-randomized Studies of Interventions (ROBINS-I), a  
39 recently developed tool, will be used.<sup>36</sup> ROBINS-I is particularly useful to those undertaking  
40 systematic reviews that include non-randomized studies of interventions. This tool is guided  
41 through seven chronologically arranged bias domains (pre-intervention, at intervention, and  
42 post-intervention), and the interpretations of domain-level and overall risk of bias judgment in  
43 ROBINS-I are classified in low, moderate, serious, or critical risk of bias.<sup>36</sup>  
44  
45  
46  
47  
48  
49  
50  
51  
52

53 Two independent reviewers (LCLJ, EOB) will assess the methodological quality of  
54 eligible trials. Two independent reviewers will score the selected studies and disagreements  
55 will be resolved by a third reviewer (ETN). The risk of bias for each outcome across  
56  
57  
58  
59  
60



1  
2  
3 individual studies will be summarized as a narrative statement, and supported by a risk of bias  
4 table. A review-level narrative summary of the risk of bias will also be provided.  
5  
6

### 7 8 **Descriptive analysis and meta-analysis**

9 For studies with a high or unclear risk of bias, defined as high or nuclear risk in 50%  
10 or more of the quality assessment outcomes, a narrative description of the risk of bias will be  
11 provided. Risk of Bias assessments will be incorporated into synthesis by performing  
12 sensitivity analysis (i.e., limiting to studies at lowest risk of bias in a secondary analysis).  
13  
14

15 A narrative synthesis will be conducted for all the included studies. Whenever  
16 possible, continuous and dichotomous outcomes will be pooled together for meta-analysis  
17 purposes. All effect sizes will be transformed into a common metric, in order to make them  
18 comparable across studies – the bias-corrected standardised difference in means (Hedges'  $g$ ) –  
19 classified as positive when in favour of the intervention and negative when in favour of the  
20 control. Heterogeneity will be assessed using  $I^2$ .<sup>42</sup> The presence of publication bias will be  
21 evaluated by use of a funnel plot and the Duval and Tweedie's trim and fill method.<sup>43</sup>  
22  
23  
24  
25  
26  
27

### 28 29 **Patient and public involvement, ethics and dissemination**

30 Patients were not directly involved in the design of this study. As this is a protocol for  
31 a systematic review and no participant recruitment will take place, their involvement on the  
32 recruitment and dissemination of findings to participants was not applicable. In addition, any  
33 amendments to this protocol will be documented with reference to saved searches and  
34 analysis methods, which will be recorded in bibliographic databases (Ovid), EndNote and  
35 Excel templates for data collection and synthesis.  
36  
37  
38  
39

40 The results of the review will be disseminated in an open access journal to ensure  
41 access for undergraduate and graduate students, researchers, academics and research groups  
42 and also will be disseminated in various media, such as: conferences, seminars, congresses or  
43 symposia.  
44  
45  
46  
47

### 48 49 **DISCUSSION**

50 One of the strengths of the proposed study is to apply a reproducible and transparent  
51 procedure for systematic review of the literature. In this protocol, we clearly describe the  
52 types of studies, participants, interventions and outcomes that will be included, as well as the  
53 data sources, search strategy, data extraction methods (including quality assessment) and  
54 methods of combining data.<sup>44</sup> By publishing the research protocol, we reinforce the clarity of  
55  
56  
57  
58  
59  
60

1  
2  
3 the strategy and minimise the risk of bias, namely selective outcome reporting.<sup>41</sup> Second, we  
4 will focus solely on the impact of the the effectiveness of clown intervention on symptom  
5 cluster management in pediatric inpatients. This results shall provide high-level information  
6 to inform, support and customise decisions from the clinicians in pediatrics settings.  
7  
8

9 Potential limitations of this study include the heterogeneity of measures and outcomes  
10 evaluated and the potentially reduced number of studies in subgroup analyses, which may  
11 negatively influence the statistical power in data synthesis.  
12  
13

14 As clinicians strive to minimize the psychological burden during the hospitalization  
15 process, they must be aware of the scientific evidence available to help them incorporate  
16 appropriate laughter and play to clinical practice.<sup>18</sup> Children and adolescents who require  
17 hospitalization represent a special challenge for the health care system as well as for health  
18 professionals, both because of the illness itself and because of the treatment process.<sup>13,32,33</sup> In  
19 addition, hospitalized children and adolescents with acute or chronic disorders are also  
20 stressed by the separation from their parents, by the hospital environment, by the fear of  
21 painful treatments or by the uncertainty in the treatment outcome.<sup>20</sup> This review will  
22 demonstrated the value in the involvement of the hospital clowns for symptom cluster  
23 management in pediatric inpatients.  
24  
25  
26  
27  
28  
29  
30  
31  
32

## 33 REFERENCES

- 34  
35 1. Nassau JH, Tien K, Fritz GK. Review of the literature: integrating  
36 psychoneuroimmunology into pediatric chronic illness interventions. *J Pediatr Psychol*  
37 2008;33:195–207.  
38  
39 2. Caserta MT, O'Connor TG, Wyman PA, *et al.* The associations between psychosocial  
40 stress and the frequency of illness, and innate and adaptive immune function in  
41 children. *Brain Behav Immun* 2008;226:933–940.  
42  
43 3. Lopes-Júnior LC, Bomfim EO, Nascimento LC, *et al.* Non-pharmacological  
44 interventions to manage fatigue and psychological stress in children and adolescents with  
45 cancer: evidences for clinical practice. *Eur J Cancer Care* 2016;25:921–935.  
46  
47 4. Nunes MDR, Bomfim EO, Olson K *et al.* Interventions minimizing fatigue in  
48 children/adolescents with cancer: an integrative review. *J Child Health Care* 2018;22:186–  
49 204.  
50  
51 5. Vitorino LM, Lopes-Júnior LC, de Oliveira GH, *et al.* Spiritual and religious coping and  
52 depression among family caregivers of pediatric cancer patients in Latin America.  
53 *Psychooncology* 2018;27:1900–1907.  
54  
55  
56  
57  
58  
59

6. N6ia TC, Sant'Ana RSE, Santos ADSD, *et al.* Coping with the diagnosis and hospitalization of a child with childhood cancer. *Invest Educ Enferm.* 2015;33:465–472.
7. Lopes J6nior LC, Rosa MADRP, Lima RAG. Psychological and psychiatric outcomes following PICU admission: a systematic review of cohort studies. *Pediatr Crit Care Med* 2018;19:e58–e67.
8. Dodd MJ, Miaskowski C, Lee KA. Occurrence of symptom clusters. *J Natl Cancer Inst Monogr* 2004;32:76–78.
9. Barsevick AM, Whitmer K, Nail LM, *et al.* Symptom cluster research: conceptual, design, measurement, and analysis issues. *J Pain Symptom Manage* 2006;31:85–95.
10. Miaskowski C, Aouizerat BE, Dodd M, *et al.* Conceptual issues in symptom clusters research and their implications for quality-of-life assessment in patients with cancer. *J Natl Cancer Inst Monogr* 2007;37:39–46.
11. Rodgers CC, Hooke MC, Hockenberry MJ. Symptom clusters in children. *Curr Opin Support Palliat Care* 2013;7:67–72.
12. Lopes-J6nior LC, Olson K, de Omena Bomfim E, *et al.* Translational research and symptom management in oncology nursing. *Br J Nurs* 2016;25:S12,S14,S16.
13. Lopes-J6nior LC, de Omena Bomfim E, Nascimento LC, *et al.* Theory of unpleasant symptoms: support for the management of symptoms in children and adolescents with cancer. *Rev Gaucha Enferm.* 2015;36:109–112.
14. Nunes MD, Jacob E, Bomfim EO, *et al.* Fatigue and health related quality of life in children and adolescents with cancer. *Eur J Oncol Nurs.* 2017;29:39–46.
15. Silva MC, Lopes LC J6nior, Nascimento LC, Lima RA. Fatigue in children and adolescents with cancer from the perspective of health professionals. *Rev Lat Am Enferm.* 2016;24:e2784.
16. Bomfim EO, Anatriello E, Nunes MDR, *et al.* Correlations between functional Interleukin-1 and changes in fatigue and quality of life in children and adolescents with cancer. *J Clin Oncol.* 2015;33:29\_suppl,95–95.
17. Lopes-J6nior LC. Translational research and nursing: the lab bench to bedside. *Journal of Nursing UFPE On Line.* 2015;9(12). doi:10.5205/01012007.
18. Spitzer P. Essay: Hospital clowns-modern-day court jesters at work. *The Lancet* 2006;368:S34–S35.
19. Oppenheim D, Simonds C, Hartmann O. Clowning on children's wards. *The Lancet.* 1997;350:1838–1840.
20. Koller D, Gryski C. The life threatened child and the life enhancing clown: towards a model of therapeutic clowning. *Evid Based Complement Alternat Med* 2008;5:17–25.

21. Bekinschtein TA, Davis MH, Rodd JM, *et al.* Why clowns taste funny: the relationship between humor and semantic ambiguity. *J Neurosci.* 2011;31:9665–9671.
22. Bennett MP, Lengacher C. Humor and laughter may influence health IV. Humor and immune function. *Evid Based Complement Alternat Med.* 2009;6:159–164.
23. Stuber M, Hilber S, Mintzer LL, *et al.* Laughter, humor and pain perception in children: a pilot study. *Evid Based Complement Alternat Med.* 2009;6:271–276.
24. Dionigi A, Sangiorgi D, Flangini R. Clown intervention to reduce preoperative anxiety in children and parents: a randomized controlled trial. *J Health Psychol.* 2014;19:369–380.
25. Vagnoli L, Caprilli S, Robiglio A, *et al.* Clown doctors as a treatment for preoperative anxiety in children: a randomized, prospective study. *Pediatrics* 2005;116:e563–e567.
26. Vagnoli L, Caprilli S, Messeri A. Parental presence, clowns or sedative premedication to treat preoperative anxiety in children: what could be the most promising option? *Paediatr Anaesth* 2010;20:937–943.
27. Dionigi A, Gremigni P. A combined intervention of art therapy and clown visits to reduce preoperative anxiety in children. *J Clin Nurs* 2017;26:632–640.
28. Bertini M, Isola E, Paolone G, *et al.* Clowns benefit children hospitalized for respiratory pathologies. *Evid Based Complement Alternat Med.* 2011:879125.
29. Meiri N, Ankri A, Hamad-Saied M, *et al.* The effect of medical clowning on reducing pain, crying, and anxiety in children aged 2–10 years old undergoing venous blood drawing—a randomized controlled study. *Eur J Pediatr* 2016;75:373–379.
30. Saliba FG, Adiwardana NS, Uehara EU, *et al.* Salivary cortisol levels: the importance of clown doctors to reduce stress. *Pediatr Rep* 2016;8:6188.
31. Sánchez JC, Echeverri LF, Londoño MJ, *et al.* Effects of a Humor Therapy Program on Stress Levels in Pediatric Inpatients. *Hosp Pediatr* 2017;7:46–53.
32. Lopes-Júnior LC, Pereira-da-Silva G, Silveira DSC, *et al.* The Effect of Clown Intervention on Self-Report and Biomarker Measures of Stress and Fatigue in Pediatric Osteosarcoma Inpatients: A Pilot Study. *Integr Cancer Ther.* 2018;17:928–940.
33. Lopes-Júnior LC, Silveira DSC, Olson K, *et al.* Clown intervention on psychological stress and fatigue in pediatric patients with cancer undergoing chemotherapy. *Cancer Nurs* [Ahead of print]. 2018.
34. Sridharan K, Sivaramakrishnan G. Therapeutic clowns in pediatrics: a systematic review and meta-analysis of randomized controlled trials. *Eur J Pediatr* 2016;175:1353–1360.
35. Zhang Y, Yang Y, Lau WY, *et al.* The effectiveness of preoperative clown intervention on psychological distress: A systematic review and meta-analysis. *J Paediatr Child Health* 2017;53:237–245.

- 1  
2  
3 36. Sterne JA, Hernán MA, Reeves BC, *et al.* ROBINS-I: a tool for assessing risk of bias in  
4 non-randomised studies of interventions. *BMJ* 2016;355:i4919.  
5  
6 37. Moher D, Shamseer L, Clarke M, *et al.* Preferred reporting items for systematic review  
7 and meta-analysis protocols (PRISMA-P) 2015 statement. *Syst Rev* 2015;4:1.  
8  
9 38. Higgins JPT, Green S, editors. Chapter 5: Defining the review question and developing  
10 criteria for including studies. *Cochrane Handbook of Systematic Reviews*. Version 5.0.1. The  
11 Cochrane Collaboration. 2008. Accessed February 5, 2013.  
12  
13 39. Lefebvre C, Manheimer E, Glanville J. Searching for studies. In: Higgins JPT, Greene S,  
14 eds. *Cochrane Handbook for Systematic Reviews of Interventions*, Version 5.0. 2008.  
15  
16 40. Jadad AR, Moore RA, Carroll D, *et al.* Assessing the quality of reports of randomized  
17 clinical trials: is blinding necessary? *Control Clin Trials* 1996;7:1–12.  
18  
19 41. Higgins JPT, Green S. *Cochrane Handbook for Systematic Reviews of Interventions*.  
20 5.1.0 edition. *Cochrane Collaboration*. Chichester, UK: John Wiley & Sons, 2016.  
21  
22 42. Egger M, Davey Smith G, Schneider M, Minder C. Bias in meta-analysis detected by a  
23 simple, graphical test. *BMJ*. 1997;315:629–34.  
24  
25 43. Duval S, Tweedie R. Trim and fill: A simple funnel-plot-based method of testing and  
26 adjusting for publication bias in meta-analysis. *Biometrics* 2000;56:455–63.  
27  
28 44. Silagy CA, Middleton P, Hopewell S. Publishing protocols of systematic reviews:  
29 comparing what was done to what was planned. *JAMA* 2002;287:2831–4.  
30  
31  
32  
33  
34  
35  
36  
37  
38  
39  
40  
41  
42  
43  
44  
45  
46  
47  
48  
49  
50  
51  
52  
53  
54  
55  
56  
57  
58  
59  
60

# Reporting checklist for protocol of a systematic review.

Based on the PRISMA-P guidelines.

## Instructions to authors

Complete this checklist by entering the page numbers from your manuscript where readers will find each of the items listed below.

Your article may not currently address all the items on the checklist. Please modify your text to include the missing information. If you are certain that an item does not apply, please write "n/a" and provide a short explanation.

Upload your completed checklist as an extra file when you submit to a journal.

In your methods section, say that you used the PRISMA-P reporting guidelines, and cite them as:

Moher D, Shamseer L, Clarke M, Ghersi D, Liberati A, Petticrew M, Shekelle P, Stewart LA. Preferred Reporting Items for Systematic Review and Meta-Analysis Protocols (PRISMA-P) 2015 statement. *Syst Rev.* 2015;4(1):1.

|                |     | Reporting Item                                                                                                                                                              | Page Number |
|----------------|-----|-----------------------------------------------------------------------------------------------------------------------------------------------------------------------------|-------------|
| Identification | #1a | Identify the report as a protocol of a systematic review                                                                                                                    | 1           |
| Update         | #1b | If the protocol is for an update of a previous systematic review, identify as such                                                                                          | n/a         |
|                | #2  | If registered, provide the name of the registry (such as PROSPERO) and registration number                                                                                  | 2           |
| Contact        | #3a | Provide name, institutional affiliation, e-mail address of all protocol authors; provide physical mailing address of corresponding author                                   | 1           |
| Contribution   | #3b | Describe contributions of protocol authors and identify the guarantor of the review                                                                                         | 1           |
|                | #4  | If the protocol represents an amendment of a previously completed or published protocol, identify as such and list changes; otherwise, state plan for documenting important | n/a         |

|    |                      |      |                                                                   |         |
|----|----------------------|------|-------------------------------------------------------------------|---------|
| 1  |                      |      | protocol amendments                                               |         |
| 2  |                      |      |                                                                   |         |
| 3  | Sources              | #5a  | Indicate sources of financial or other support for the review     | 1       |
| 4  |                      |      |                                                                   |         |
| 5  | Sponsor              | #5b  | Provide name for the review funder and / or sponsor               | 1       |
| 6  |                      |      |                                                                   |         |
| 7  | Role of sponsor or   | #5c  | Describe roles of funder(s), sponsor(s), and / or institution(s), | 1       |
| 8  | funder               |      | if any, in developing the protocol                                |         |
| 9  |                      |      |                                                                   |         |
| 10 |                      |      |                                                                   |         |
| 11 | Rationale            | #6   | Describe the rationale for the review in the context of what is   | 3       |
| 12 |                      |      | already known                                                     |         |
| 13 |                      |      |                                                                   |         |
| 14 |                      |      |                                                                   |         |
| 15 | Objectives           | #7   | Provide an explicit statement of the question(s) the review will  | 4 and 5 |
| 16 |                      |      | address with reference to participants, interventions,            |         |
| 17 |                      |      | comparators, and outcomes (PICO)                                  |         |
| 18 |                      |      |                                                                   |         |
| 19 |                      |      |                                                                   |         |
| 20 | Eligibility criteria | #8   | Specify the study characteristics (such as PICO, study design,    | 5       |
| 21 |                      |      | setting, time frame) and report characteristics (such as years    |         |
| 22 |                      |      | considered, language, publication status) to be used as           |         |
| 23 |                      |      | criteria for eligibility for the review                           |         |
| 24 |                      |      |                                                                   |         |
| 25 |                      |      |                                                                   |         |
| 26 |                      |      |                                                                   |         |
| 27 | Information          | #9   | Describe all intended information sources (such as electronic     | 4 and 5 |
| 28 | sources              |      | databases, contact with study authors, trial registers or other   |         |
| 29 |                      |      | grey literature sources) with planned dates of coverage           |         |
| 30 |                      |      |                                                                   |         |
| 31 |                      |      |                                                                   |         |
| 32 | Search strategy      | #10  | Present draft of search strategy to be used for at least one      | 4       |
| 33 |                      |      | electronic database, including planned limits, such that it       |         |
| 34 |                      |      | could be repeated                                                 |         |
| 35 |                      |      |                                                                   |         |
| 36 |                      |      |                                                                   |         |
| 37 | Study records -      | #11a | Describe the mechanism(s) that will be used to manage             | 4       |
| 38 | data management      |      | records and data throughout the review                            |         |
| 39 |                      |      |                                                                   |         |
| 40 |                      |      |                                                                   |         |
| 41 | Study records -      | #11b | State the process that will be used for selecting studies (such   | 4       |
| 42 | selection process    |      | as two independent reviewers) through each phase of the           |         |
| 43 |                      |      | review (that is, screening, eligibility and inclusion in meta-    |         |
| 44 |                      |      | analysis)                                                         |         |
| 45 |                      |      |                                                                   |         |
| 46 |                      |      |                                                                   |         |
| 47 |                      |      |                                                                   |         |
| 48 | Study records -      | #11c | Describe planned method of extracting data from reports           | 4 and 5 |
| 49 | data collection      |      | (such as piloting forms, done independently, in duplicate), any   |         |
| 50 | process              |      | processes for obtaining and confirming data from investigators    |         |
| 51 |                      |      |                                                                   |         |
| 52 |                      |      |                                                                   |         |
| 53 | Data items           | #12  | List and define all variables for which data will be sought       | 5       |
| 54 |                      |      | (such as PICO items, funding sources), any pre-planned data       |         |
| 55 |                      |      | assumptions and simplifications                                   |         |
| 56 |                      |      |                                                                   |         |
| 57 |                      |      |                                                                   |         |
| 58 |                      |      |                                                                   |         |
| 59 |                      |      |                                                                   |         |
| 60 |                      |      |                                                                   |         |



|    |                    |      |                                                                                 |         |
|----|--------------------|------|---------------------------------------------------------------------------------|---------|
| 1  | Outcomes and       | #13  | List and define all outcomes for which data will be sought,                     | 5       |
| 2  | prioritization     |      | including prioritization of main and additional outcomes, with                  |         |
| 3  |                    |      | rationale                                                                       |         |
| 4  |                    |      |                                                                                 |         |
| 5  |                    |      |                                                                                 |         |
| 6  | Risk of bias in    | #14  | Describe anticipated methods for assessing risk of bias of                      | 6       |
| 7  | individual studies |      | individual studies, including whether this will be done at the                  |         |
| 8  |                    |      | outcome or study level, or both; state how this information will                |         |
| 9  |                    |      | be used in data synthesis                                                       |         |
| 10 |                    |      |                                                                                 |         |
| 11 |                    |      |                                                                                 |         |
| 12 |                    |      |                                                                                 |         |
| 13 | Data synthesis     | #15a | Describe criteria under which study data will be quantitatively                 | 7       |
| 14 |                    |      | synthesised                                                                     |         |
| 15 |                    |      |                                                                                 |         |
| 16 |                    |      |                                                                                 |         |
| 17 |                    | #15b | If data are appropriate for quantitative synthesis, describe                    | 7       |
| 18 |                    |      | planned summary measures, methods of handling data and                          |         |
| 19 |                    |      | methods of combining data from studies, including any                           |         |
| 20 |                    |      | planned exploration of consistency (such as I <sup>2</sup> , Kendall's $\tau$ ) |         |
| 21 |                    |      |                                                                                 |         |
| 22 |                    |      |                                                                                 |         |
| 23 |                    |      |                                                                                 |         |
| 24 |                    | #15c | Describe any proposed additional analyses (such as                              | 7       |
| 25 |                    |      | sensitivity or subgroup analyses, meta-regression)                              |         |
| 26 |                    |      |                                                                                 |         |
| 27 |                    |      |                                                                                 |         |
| 28 |                    | #15d | If quantitative synthesis is not appropriate, describe the type                 | 7       |
| 29 |                    |      | of summary planned                                                              |         |
| 30 |                    |      |                                                                                 |         |
| 31 | Meta-bias(es)      | #16  | Specify any planned assessment of meta-bias(es) (such as                        | n/a     |
| 32 |                    |      | publication bias across studies, selective reporting within                     |         |
| 33 |                    |      | studies)                                                                        |         |
| 34 |                    |      |                                                                                 |         |
| 35 |                    |      |                                                                                 |         |
| 36 |                    |      |                                                                                 |         |
| 37 | Confidence in      | #17  | Describe how the strength of the body of evidence will be                       | 7 and 8 |
| 38 | cumulative         |      | assessed (such as GRADE)                                                        |         |
| 39 | evidence           |      |                                                                                 |         |
| 40 |                    |      |                                                                                 |         |
| 41 |                    |      |                                                                                 |         |

42 The PRISMA-P checklist is distributed under the terms of the Creative Commons Attribution License  
 43 CC-BY 4.0. This checklist was completed on 06. September 2018 using <http://www.goodreports.org/>,  
 44 a tool made by the [EQUATOR Network](#) in collaboration with [Penelope.ai](#)  
 45  
 46  
 47  
 48  
 49  
 50  
 51  
 52  
 53  
 54  
 55  
 56  
 57  
 58  
 59  
 60

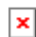

**A SYSTEMATIC REVIEW PROTOCOL EXAMINING THE  
EFFECTIVENESS OF HOSPITAL CLOWNS FOR SYMPTOM  
CLUSTER MANAGEMENT IN PEDIATRICS**

|                                 |                                                                                                                                                                                                                                                                                                                                                                                                                                                                                                                                                                                                                                                                                                                                                                                                                                                                                                                                                                                                                                                |
|---------------------------------|------------------------------------------------------------------------------------------------------------------------------------------------------------------------------------------------------------------------------------------------------------------------------------------------------------------------------------------------------------------------------------------------------------------------------------------------------------------------------------------------------------------------------------------------------------------------------------------------------------------------------------------------------------------------------------------------------------------------------------------------------------------------------------------------------------------------------------------------------------------------------------------------------------------------------------------------------------------------------------------------------------------------------------------------|
| Journal:                        | <i>BMJ Open</i>                                                                                                                                                                                                                                                                                                                                                                                                                                                                                                                                                                                                                                                                                                                                                                                                                                                                                                                                                                                                                                |
| Manuscript ID                   | bmjopen-2018-026524.R1                                                                                                                                                                                                                                                                                                                                                                                                                                                                                                                                                                                                                                                                                                                                                                                                                                                                                                                                                                                                                         |
| Article Type:                   | Protocol                                                                                                                                                                                                                                                                                                                                                                                                                                                                                                                                                                                                                                                                                                                                                                                                                                                                                                                                                                                                                                       |
| Date Submitted by the Author:   | 19-Nov-2018                                                                                                                                                                                                                                                                                                                                                                                                                                                                                                                                                                                                                                                                                                                                                                                                                                                                                                                                                                                                                                    |
| Complete List of Authors:       | <p>LOPES-JÚNIOR, LUÍS CARLOS; Universidade de Sao Paulo Campus de Ribeirao Preto, Department Maternal-Infant Nursing and Public Health Lima, Regina Aparecida Garcia; Universidade de Sao Paulo Campus de Ribeirao Preto, Department of Maternal-Infant and Public Health Nursing Olson, Karin; University of Alberta, Faculty of Nursing Bomfim, Emiliana; University of Saskatchewan College of Medicine, Department of Medicine</p> <p>Neves, Eliane Tatsch; Universidade Federal de Santa Maria, Nursing Department</p> <p>Silveira, Denise Sayuri Calheiros da; Universidade de Sao Paulo Faculdade de Medicina de Ribeirao Preto, Department of Biochemistry and Immunology</p> <p>Nunes, Michelle Darezza Rodrigues; Faculdade de Enfermagem da UERJ, Nursing Department</p> <p>Nascimento, Lucila; University of São Paulo, Department of Maternal-Infant and Public Health Nursing</p> <p>Pereira-da-Silva, Gabriela; Universidade de Sao Paulo Campus de Ribeirao Preto, Department of Maternal-Infant and Public Health Nursing</p> |
| <b>Primary Subject Heading</b>: | Paediatrics                                                                                                                                                                                                                                                                                                                                                                                                                                                                                                                                                                                                                                                                                                                                                                                                                                                                                                                                                                                                                                    |
| Secondary Subject Heading:      | Paediatrics, Complementary medicine, Evidence based practice, Research methods                                                                                                                                                                                                                                                                                                                                                                                                                                                                                                                                                                                                                                                                                                                                                                                                                                                                                                                                                                 |
| Keywords:                       | Clown intervention, Symptom management, Symptom clusters, Child, Adolescent, Pediatrics                                                                                                                                                                                                                                                                                                                                                                                                                                                                                                                                                                                                                                                                                                                                                                                                                                                                                                                                                        |
|                                 |                                                                                                                                                                                                                                                                                                                                                                                                                                                                                                                                                                                                                                                                                                                                                                                                                                                                                                                                                                                                                                                |

SCHOLARONE™  
Manuscripts

*Title Page – BMJ Open*

**A SYSTEMATIC REVIEW PROTOCOL EXAMINING THE EFFECTIVENESS OF HOSPITAL CLOWNS FOR SYMPTOM CLUSTER MANAGEMENT IN PEDIATRICS**

Luís C. Lopes-Júnior<sup>1</sup>, RN, PhD. E-mail: [luisgen@usp.br](mailto:luisgen@usp.br)  
Regina A. G. Lima<sup>1</sup>, RN, PhD. E-mail: [limare@eerp.usp.br](mailto:limare@eerp.usp.br)  
Karin Olson<sup>2</sup>, RN, PhD. E-mail: [kolson@ualberta.ca](mailto:kolson@ualberta.ca)  
Emiliana Bomfim<sup>3</sup>, RN, MSc. PhD candidate. E-mail: [e.bomfim@usask.ca](mailto:e.bomfim@usask.ca)  
Eliane T. Neves<sup>4</sup>, RN, PhD. E-mail: [elianeves03@gmail.com](mailto:elianeves03@gmail.com)  
Denise S. C. Silveira<sup>5</sup>, BS, PhD. E-mail: [denise\\_sayuri@usp.br](mailto:denise_sayuri@usp.br)  
Michelle D. R. Nunes<sup>6</sup>, RN, PhD. E-mail: [mid13@hotmail.com](mailto:mid13@hotmail.com)  
Lucila C. Nascimento<sup>1</sup>, RN, PhD. E-mail: [lucila@eerp.usp.br](mailto:lucila@eerp.usp.br)  
Gabriela Pereira-da-Silva<sup>1</sup>, BS, PhD. E-mail: [gbiisson@eerp.usp.br](mailto:gbiisson@eerp.usp.br)

**Affiliations and addresses:** <sup>1</sup>University of São Paulo at Ribeirão Preto College of Nursing, WHO Collaborating Centre for Nursing Research Development. Ribeirão Preto, SP, Brazil; <sup>2</sup>University of Alberta. Edmonton, AB, Canada; <sup>3</sup>University of Saskatchewan, College of Medicine. Saskatoon, SK, Canada; <sup>4</sup>Federal University of Santa Maria. Santa Maria, RS, Brazil; <sup>5</sup>University of São Paulo at Ribeirão Preto Medical School. Ribeirão Preto, SP, Brazil; and <sup>6</sup>Rio de Janeiro State University. Rio de Janeiro, RJ, Brazil.

**Corresponding author:** Luís C. Lopes-Júnior. Department of Maternal-Infant and Public Health Nursing, University of São Paulo at Ribeirão Preto College of Nursing, WHO Collaborating Centre for Nursing Research Development, Avenida dos Bandeirantes, 3900, Campus Universitário, Ribeirão Preto, SP, Brazil, 14040-902. [[luisgen@usp.br](mailto:luisgen@usp.br)], +5516981126357.

**Acknowledgements**

We would like to thank the Coordination of Improvement of Higher Education Personnel - CAPES, Brazil, for supporting this research with regular doctoral scholarship to Luís Carlos Lopes Júnior as well as his Doctoral Fellowship/Internship at the University of Alberta (UofA), Edmonton, Alberta, Canada, through the Doctoral “Sandwich” Program Abroad – PDSE/CAPES (Process N<sup>o</sup>: BEX 9321/14-4).

**Author Contributions:** LCLJ, RAGL and KO conceptualized and designed the protocol, drafted the initial manuscript, and reviewed the manuscript. LCLJ, EB and ETN defined the concepts and search items, data extraction process as well as methodological appraisal of the studies. DSCS and MDRN planned the data extraction and statistical analysis. LCN and GPS, provided critical insights. All authors have approved and contributed to the final written manuscript.

**Funding:** This research was funded by the Coordination for the Improvement of Higher Education Personnel (CAPES), Process number: BEX 9321/14-4.

**Data Statement section:** PROSPERO registration number: CRD42018107099. Available in: [https://www.crd.york.ac.uk/prospero/display\\_record.php?RecordID=107099](https://www.crd.york.ac.uk/prospero/display_record.php?RecordID=107099)

**Word Count:** 2446 words.

**Disclaimer:** The views of the authors do not necessarily reflect those of the NHS, NIHR or the Department of Health.

**Competing interests:** None declared.

**Patient consent:** Not required.

**Provenance and peer review:** Not commissioned; externally peer reviewed.

## ABSTRACT

**Introduction:** Clown intervention may playing an important complementary role in pediatric care and recovery. However, data on its utility for symptom cluster management of hospitalized children and adolescents in acute and chronic disorders are yet to be critically evaluated. As clinicians strive to minimize the psychological burden during hospitalization, it is important that they are aware of the scientific evidences available regarding clown intervention for symptom management. We aim to provide quality evidence for the effectiveness of clown intervention on symptom cluster management in pediatric inpatients, both in acute and chronic conditions.

**Methods and analysis:** A systematic review of randomized controlled trials (RCTs) and non-randomized controlled trials (NRCTs) will be conducted. MEDLINE, Web of Science, Cochrane Library, Science Direct, PsycINFO, CINAHL, LILACS and SciELO databases will be searched from January 2000 to December 2018. Primary outcomes will include measures related with the effect of clown intervention on symptom cluster of pediatric inpatients (anxiety, depression, pain, fatigue, stress, and psychological, emotional responses and perceived well-being). Study selection will follow the Preferred Reporting Items for Systematic Reviews and Meta-Analyses guidelines and the methodological appraisal of the studies will be assessed by the Jadad Scale as well as Cochrane Risk-of-Bias Tool for RCTs, and Risk-of-Bias In Non-Randomized Studies-ROBINS-I Tool for NRCTs. A narrative synthesis will be conducted for all included studies. Also, if sufficient data are available, a meta-analysis will be conducted. The effect sizes will be generated using Hedges' g score, for both fixed and random effect models.  $I^2$  statistics will be used to assess heterogeneity and identify their potential sources.

**Ethics and dissemination:** As it will be a systematic review, without human beings involvement, there will be no require for ethical approval. Findings will be disseminated widely through peer-reviewed publication and in various media, e.g. conferences, congresses or symposia.

**PROSPERO registration number:** CRD42018107099.

**Keywords:** Clown intervention; Symptom management; Symptom clusters; Child; Adolescent; Pediatrics.

### Strengths and limitations of this study:

- This protocol reduces the possibility of duplication, gives transparency to the methods and processes that will be used, reduces possible biases and allows peer review.
- Will offer highest level of evidence for informed decisions from this systematic review of randomised controlled trials as well as non-randomized controlled trials.
- This systematic review will be the first to explore the effectiveness of clown intervention for symptom cluster management of hospitalized children and adolescents in acute and chronic disorders.
- The scarcity of of randomised controlled trials undertaken with pediatric inpatients with chronic disorders, the publication bias and the methodological quality of the grey literature found may be the main limitations of the study.

# A SYSTEMATIC REVIEW PROTOCOL EXAMINING THE EFFECTIVENESS OF HOSPITAL CLOWNS FOR SYMPTOM CLUSTER MANAGEMENT IN PEDIATRICS

## INTRODUCTION

Illness produces stress, and well-being, self-confidence, and psychological processes that may regulate immune responses can be significant factors for recovery and response to treatment.<sup>1,2</sup> The procedures and treatments performed in hospital settings can further increase patient burden, especially for hospitalized children and adolescents, requiring specific strategies to help them cope with hospitalization, avoid stress-related disorders, and psychoneurological symptom clusters.<sup>2-7</sup> Therefore, alleviating psychoneurological symptom clusters caused by the hospitalization process has become of major interest in pediatric wards.<sup>8-17</sup> Since therapeutic clowning began in North America in 1986, it has become a popular practice in pediatric settings, mainly in acute and rehabilitation hospitals worldwide.<sup>18,19</sup> As clown intervention, a non-pharmacological approach, has been shown to have a generally positive effect in the outcomes of pediatric patients<sup>18-20</sup>, reviews conducted in on this theme showed conflicting results.<sup>21-23</sup>

It has been shown that this intervention can enhance emotional and behavioral processes, for instance, improving well-being and self-confidence, and reducing stress and anxiety levels.<sup>24-32</sup> In addition, evidence suggests that hospital clowns help pediatric patients to better adapt to their hospital surroundings and can distract from, and demystify painful or frightening procedures through ‘doses of fun’ to complement traditional clinical interventions.<sup>18,27,30</sup> This hypothesis is supported by studies showing that clown intervention enhances emotional and behavioral responses.<sup>25,26</sup> Positive changes in emotional responses arising from humor and laughter have been correlated with increased pain thresholds and immunity, inversely correlated with stress hormone levels, and linked to positive health.<sup>25,26</sup> Despite this recognition, few studies have investigated the molecular mechanisms that mediate the positive health outcomes of clown intervention.<sup>33-36</sup>

Recently, a review of literature has investigated evidences from the 28 randomized controlled trials (RCTs) for the effects of healthcare clowning on children. This review revealed different settings in which RCTs have been conducted such as preoperative areas, during medical procedures, and during hospitalization. Overall, the results show that clown interventions are effective in decreasing negative emotions and psychological symptoms and in enhancing the well-being of patients and their relatives.<sup>23</sup>

Additionally, two systematic reviews and meta-analyses looked at the effects of clown intervention in pediatric hospital settings.<sup>21,22</sup> One of them concluded that hospital clowns play

1  
2  
3 a significant role in reducing stress and anxiety levels in children staying in a pediatric ward or  
4 undergoing invasive procedures or minor surgeries under anesthesia, as well as in their parents<sup>21</sup>  
5 and the other confirmed the strong effect of clown intervention in reducing children's pre-  
6 operative psychological distress.<sup>22</sup> However, both reviews focused solely on acute situations.  
7  
8 Furthermore, one of the reviews<sup>21</sup> looked at both randomized and non-randomized controlled  
9 trials, but lacked a specific tool for a bias analysis of the latter. Finally, both failed to investigate  
10 the effectiveness of clown intervention for a range of symptom clusters in hospitalized children  
11 and adolescents in depth. Hence, in this systematic review we evaluated evidence on the  
12 effectiveness of clown intervention for symptom clusters management in hospitalized children  
13 and adolescents in a variety of pediatric settings, both in acute and chronic conditions, from  
14 both randomized and nonrandomized controlled trials, assessing the quality of the latter with a  
15 recently developed tool, ROBINS-1.<sup>37</sup>  
16  
17  
18  
19  
20  
21  
22  
23

24 This review will expand on the above-mentioned works, in order to identify recent  
25 methodological and scientific progress until December 2018. Following the Preferred  
26 Reporting Items for Systematic Reviews and Meta-Analyses Protocols (PRISMA-P) checklist  
27 as guidance,<sup>38</sup> we propose a systematic and reproducible strategy to query the literature about  
28 the effectiveness of clown intervention on symptom cluster management in pediatric inpatients.  
29  
30  
31  
32  
33

## 34 **METHODS AND ANALYSIS**

### 35 **Search Strategy**

36  
37  
38 The search strategy will be performed using resources that enhance methodological  
39 transparency and improve the reproducibility of the results and evidence synthesis. In this sense,  
40 the search strategy will be elaborated and implemented prior to study selection, according to  
41 the PRISMA-P checklist as guidance.<sup>38</sup> Additionally, using the PICOS strategy<sup>39</sup> we elaborated  
42 the guiding question of this review, in order to ensure the systematic search of available  
43 literature: *"What is the effect of clown intervention for symptom management in hospitalized*  
44 *children and adolescents?"* The PROSPERO – International Prospective Register of Systematic  
45 Reviews – registration number is: CRD42018107099  
46  
47  
48  
49  
50  
51  
52  
53 ([https://www.crd.york.ac.uk/prospero/display\\_record.php?RecordID=107099](https://www.crd.york.ac.uk/prospero/display_record.php?RecordID=107099))  
54

55 Studies will be retrieved using eight databases: MEDLINE (via Pubmed), Web of  
56 Science, Cochrane Library, Science Direct, PsycINFO, CINAHL, LILACS and SciELO. In  
57 order to reflect contemporary practice, a search of the literature from the last 18 years (January  
58 2000 to December 2018) will be performed. There will be no restriction regarding the language  
59  
60



to avoid the reduce the yield of appropriate articles and also generalizability. In addition, the reference section in the studies returned by the above search were scrutinized for additional relevant articles. It is noteworthy that two researchers (LCLJ and EOB) will performed the search strategy independently. Also, the bibliographic software EndNote (<https://www.myendnoteweb.com/>) will be used to store, organize, and manage all the references and ensure a systematic and comprehensive search.

Initially, the existence of controlled descriptors (such as MeSH terms, CINAHL headings, PsycINFO thesaurus, and DeCS-Health Science Descriptors) and their synonyms (key words) was verified in each database. The search terms were combined using the Boolean operators “AND” and “OR”.<sup>40</sup>

Subsequently, a search strategy combining MeSH terms and free-text words, such as: (child OR child, hospitalized OR adolescent OR adolescent, hospitalized OR pediatrics) AND (clown doctors OR medical clown OR clown intervention OR clowns OR therapeutic clown OR clowns in hospital) AND (symptoms OR affective symptoms OR behavioral symptoms OR clusters of neuropsychological symptoms OR neuropsychological symptoms OR anxiety OR stress, psychological OR distress OR psychological impact) was used. In order to locate the clinical trials, we added a filter after the PICOS search strategy that included the following terms: AND (randomized controlled trial OR randomized controlled trials as topic OR controlled clinical trial OR clinical trial OR nonrandomized controlled trials).

### Study selection criteria

A summary of the participants, interventions, comparators and outcomes considered, as well as the type of studies included according to PICOS strategy, is provided in Table 1.

**Table 1** Inclusion and exclusion criteria

| PICOS Strategy <sup>39</sup> | Inclusion criteria                                                                                                                                    | Exclusion criteria                                                                                                            |
|------------------------------|-------------------------------------------------------------------------------------------------------------------------------------------------------|-------------------------------------------------------------------------------------------------------------------------------|
| P – Population               | Hospitalized children and adolescents for acute conditions or chronic disorders.                                                                      | Non-hospitalized children and adolescents.                                                                                    |
| I – Intervention             | Clown intervention                                                                                                                                    |                                                                                                                               |
| C – Comparison               | Usual standard of care without receiving clown intervention.                                                                                          |                                                                                                                               |
| O – Outcome                  | Any measure related to symptom clusters: anxiety, depression, pain, fatigue, stress, and psychological, emotional responses and perceived well-being. | Studies that do not report any symptom cluster as primary outcome                                                             |
| S – Study design             | Randomized controlled trial and nonrandomized controlled trials (quasi-experimental study).                                                           | All the non-primary literature, such as reviews, dissertations, theses, editorials, protocol studies and clinical guidelines. |



1  
2  
3 Symptom clusters outcomes will be measured all three dimensions of symptom  
4 occurrence, severity, and distress.<sup>41</sup> The key outcome will be measured considering the extent  
5 of symptom cluster felt by children during the hospitalization.  
6  
7

8 The primary outcome measures will be the number of children with any symptom cluster  
9 during hospitalization, the extent of symptom cluster felt by children measured by any validated  
10 scale for the respective symptoms. The secondary outcome measures will be the number of  
11 children with acute conditions or chronic disorders, number of children satisfied with the care  
12 provided, number of parents satisfied with the care provided.  
13  
14  
15  
16

17 It is noteworthy that symptom cluster composition, consistency, and stability vary  
18 widely depending on a host of measurement factors, including the optimal assessment tool (long  
19 vs. short), the most clinically relevant symptom dimensions (prevalence vs. severity or distress  
20 caused), the optimal analytical method to derive the cluster, the optimal statistical “cutoff”  
21 points to define symptom cluster, and the optimal timing of assessment.<sup>41</sup> Thus, we will  
22 consider in our analysis factors such as variation in measurement timing, the number of  
23 symptoms included in an analysis, in order to generalizability of symptom cluster over time.<sup>42,43</sup>  
24  
25  
26  
27  
28  
29  
30

### 31 **Screening and data extraction**

32 Initial screening of studies will be based on the information contained in their titles and  
33 abstracts and will be conducted by two independent investigators (LCLJ and EOB). When the  
34 reviewers disagreed, the article will be reevaluated and, if the disagreement persisted, a third  
35 reviewer (ETN) will make a final decision. Full-paper screening will be conducted by the same  
36 independent investigators. Cohen’s kappa will be used to measure inter-coder agreement in  
37 each screening phase.  
38  
39  
40  
41  
42

43 Data will be extracted using a previously proposed tool<sup>44</sup>, including four domains: i)  
44 identification of the study (article title; journal title; impact factor of the journal; authors;  
45 country of the study; language; publication year; host institution of the study [hospital;  
46 university; research center; single institution; multicenter study]); ii) methodological  
47 characteristics (study design; study objective or research question or hypothesis; sample  
48 characteristics, e.g. sample size, sex; age, race; acute and/or chronic diagnoses; groups and  
49 controls; stated length of follow-up; validated measures; statistical analyses, adjustments; iii)  
50 main findings; and iv) conclusions. If the outcome data in the original article were unclear, the  
51 corresponding author will be contacted via e-mail for clarification. For data extraction two  
52 independent Microsoft Excel spreadsheets will be elaborated for two reviewers (LCLJ and EOB)  
53  
54  
55  
56  
57  
58  
59  
60

1  
2  
3 to summarize the data from the included studies. Then, the spreadsheets were combined into  
4 one. Disagreements will be resolved by a third investigator (ETN).  
5  
6  
7

### 8 **Quality assessment**

9  
10 Methodological quality of the RCTs will be assessed using the Jadad scale,<sup>45</sup> a widely  
11 used tool for classification of the quality of the evidence from RCTs. The Jadad scale scores  
12 range from 0 to 5, with studies scoring < 3 considered as low quality, and studies that score ≥  
13 3 classified as high quality.<sup>45</sup> The internal validity and risk of bias for RCTs will be assessed  
14 with the appraisal tool from the Cochrane Handbook for Systematic Reviews of Interventions  
15 5.1.0,<sup>46</sup> which assesses the following study-level aspects: (1) randomisation sequence  
16 allocation; (2) allocation concealment; (3) blinding; (4) completeness of outcome data and (5)  
17 selective outcome reporting; and classifies studies into low, high or unclear risk of bias. For  
18 assessing NRCT, the Risk of Bias In Non-randomized Studies of Interventions (ROBINS-I), a  
19 recently developed tool, will be used.<sup>37</sup> ROBINS-I is particularly useful to those undertaking  
20 systematic reviews that include non-randomized studies of interventions. This tool is guided  
21 through seven chronologically arranged bias domains (pre-intervention, at intervention, and  
22 post-intervention), and the interpretations of domain-level and overall risk of bias judgment in  
23 ROBINS-I are classified in low, moderate, serious, or critical risk of bias.<sup>37</sup>  
24  
25  
26  
27  
28  
29  
30  
31  
32  
33

34 Two independent reviewers (LCLJ, EOB) will assess the methodological quality of  
35 eligible trials. Two independent reviewers will score the selected studies and disagreements  
36 will be resolved by a third reviewer (ETN). The risk of bias for each outcome across individual  
37 studies will be summarized as a narrative statement, and supported by a risk of bias table. A  
38 review-level narrative summary of the risk of bias will also be provided.  
39  
40  
41  
42  
43  
44

### 45 **Descriptive analysis and meta-analysis**

46 For studies with a high or unclear risk of bias, defined as high or nuclear risk in 50% or  
47 more of the quality assessment outcomes, a narrative description of the risk of bias will be  
48 provided. Risk of Bias assessments will be incorporated into synthesis by performing sensitivity  
49 analysis (i.e., limiting to studies at lowest risk of bias in a secondary analysis).  
50  
51  
52

53 A narrative synthesis will be conducted for all the included studies. All effect sizes will  
54 be transformed into a common metric, in order to make them comparable across studies – the  
55 bias-corrected standardised difference in means (Hedges'  $g$ ) – classified as positive when in  
56 favour of the intervention and negative when in favour of the control. For continuous outcome  
57 measures, standardized mean differences (SMD) and risk ratio (RR) for categorical outcomes  
58  
59  
60

1  
2  
3 will be considered for the final assessment from individual studies. SMD was chosen as a  
4 measure of pooled results considering the likely variability in the measuring scales for  
5 continuous outcomes.<sup>21</sup> The SMD will be categorized as small, medium, and large based on the  
6 thresholds 0.2, 0.5, and 0.8, respectively, as suggested by Cohen's.<sup>47</sup> The 95 % CI will be used  
7 to represent the deviation from the point estimate for both the individual studies and the pooled  
8 estimate. Heterogeneity between the studies will be assessed using forest plot visually, as well  
9 as  $I^2$  statistics.<sup>48</sup> Random effect models will be used in case of moderate to severe heterogeneity  
10 otherwise fixed effect models will be generated. In addition, the presence of publication bias  
11 will be evaluated by use of a funnel plot and the Duval and Tweedie's trim and fill method.<sup>49</sup>  
12  
13  
14  
15  
16  
17  
18  
19

### 20 **Patient and public involvement**

21  
22 Patients were not directly involved in the design of this study. As this is a protocol for  
23 a systematic review and no participant recruitment will take place, their involvement on the  
24 recruitment and dissemination of findings to participants was not applicable.  
25  
26  
27  
28

### 29 **Amendments**

30 Any amendments to this protocol will be documented with reference to saved searches  
31 and analysis methods, which will be recorded in bibliographic databases (Ovid), EndNote and  
32 Excel templates for data collection and synthesis.  
33  
34  
35  
36

### 37 **Dissemination**

38  
39 The results of the review will be disseminated in an open access journal to ensure access  
40 for undergraduate and graduate students, researchers, academics and research groups and also  
41 will be disseminated in various media, such as: conferences, seminars, congresses or symposia.  
42  
43  
44  
45

### 46 **DISCUSSION**

47  
48 One of the strengths of the proposed study is to apply a reproducible and transparent  
49 procedure for systematic review of the literature. In this protocol, we clearly describe the types  
50 of studies, participants, interventions and outcomes that will be included, as well as the data  
51 sources, search strategy, data extraction methods (including quality assessment) and methods  
52 of combining data.<sup>50</sup> By publishing the research protocol, we reinforce the clarity of the strategy  
53 and minimise the risk of bias, namely selective outcome reporting.<sup>46</sup> Second, we will focus  
54 solely on the impact of the the effectiveness of clown intervention on symptom cluster  
55  
56  
57  
58  
59  
60

1  
2  
3 management in pediatric inpatients. This results shall provide high-level information to inform,  
4 support and customise decisions from the clinicians in pediatrics settings.  
5

6 Potential limitations of this study include the heterogeneity of measures and outcomes  
7 evaluated and the potentially reduced number of studies in subgroup analyses, which may  
8 negatively influence the statistical power in data synthesis.  
9

10 As clinicians strive to minimize the psychological burden during the hospitalization  
11 process, they must be aware of the scientific evidence available to help them incorporate  
12 appropriate laughter and play to clinical practice.<sup>18</sup> Children and adolescents who require  
13 hospitalization represent a special challenge for the health care system as well as for health  
14 professionals, both because of the illness itself and because of the treatment process.<sup>13,35,36</sup> In  
15 addition, hospitalized children and adolescents with acute or chronic disorders are also stressed  
16 by the separation from their parents, by the hospital environment, by the fear of painful  
17 treatments or by the uncertainty in the treatment outcome.<sup>20</sup> This review will demonstrated the  
18 value in the involvement of the hospital clowns for symptom cluster management in pediatric  
19 inpatients.  
20  
21  
22  
23  
24  
25  
26  
27  
28  
29  
30  
31

## 32 REFERENCES

- 33 1. Nassau JH, Tien K, Fritz GK. Review of the literature: integrating  
34 psychoneuroimmunology into pediatric chronic illness interventions. *J Pediatr Psychol*  
35 2008;33:195–207.  
36
- 37 2. Caserta MT, O'Connor TG, Wyman PA, *et al.* The associations between psychosocial  
38 stress and the frequency of illness, and innate and adaptive immune function in children. *Brain*  
39 *Behav Immun* 2008;226:933–940.  
40
- 41 3. Lopes-Júnior LC, Bomfim EO, Nascimento LC, *et al.* Non-pharmacological interventions  
42 to manage fatigue and psychological stress in children and adolescents with cancer: an  
43 integrative review. *Eur J Cancer Care* 2016;25:921–935.  
44
- 45 4. Nunes MDR, Bomfim EO, Olson K *et al.* Interventions minimizing fatigue in  
46 children/adolescents with cancer: an integrative review. *J Child Health Care* 2018;22:186–204.  
47
- 48 5. Vitorino LM, Lopes-Júnior LC, de Oliveira GH, *et al.* Spiritual and religious coping and  
49 depression among family caregivers of pediatric cancer patients in Latin America.  
50 *Psychooncology* 2018;27:1900–1907.  
51
- 52 6. Nóia TC, Sant'Ana RSE, Santos ADSD, *et al.* Coping with the diagnosis and hospitalization  
53 of a child with childhood cancer. *Invest Educ Enferm.* 2015;33:465–472.  
54  
55  
56  
57  
58  
59  
60

- 1  
2  
3 7. Lopes-Júnior LC, Rosa MADRP, Lima RAG. Psychological and psychiatric outcomes  
4 following PICU admission: a systematic review of cohort studies. *Pediatr Crit Care Med*  
5 2018;19:e58–e67.  
6
- 7  
8 8. Dodd MJ, Miaskowski C, Lee KA. Occurrence of symptom clusters. *J Natl Cancer Inst*  
9 *Monogr* 2004;32:76–78.  
10
- 11 9. Barsevick AM, Whitmer K, Nail LM, *et al.* Symptom cluster research: conceptual, design,  
12 measurement, and analysis issues. *J Pain Symptom Manage* 2006;31:85–95.  
13
- 14 10. Miaskowski C, Aouizerat BE, Dodd M, *et al.* Conceptual issues in symptom clusters  
15 research and their implications for quality-of-life assessment in patients with cancer. *J Natl*  
16 *Cancer Inst Monogr* 2007;37:39–46.  
17
- 18 11. Rodgers CC, Hooke MC, Hockenberry MJ. Symptom clusters in children. *Curr Opin*  
19 *Support Palliat Care* 2013;7:67–72.  
20
- 21 12. Lopes-Júnior LC, Olson K, de Omena Bomfim E, *et al.* Translational research and symptom  
22 management in oncology nursing. *Br J Nurs* 2016;25:S12,S14,S16.  
23
- 24 13. Lopes-Júnior LC, de Omena Bomfim E, Nascimento LC, *et al.* Theory of unpleasant  
25 symptoms: support for the management of symptoms in children and adolescents with cancer.  
26 *Rev Gaucha Enferm.* 2015;36:109–112.  
27
- 28 14. Nunes MD, Jacob E, Bomfim EO, *et al.* Fatigue and health related quality of life in children  
29 and adolescents with cancer. *Eur J Oncol Nurs.* 2017;29:39–46.  
30
- 31 15. Silva MC, Lopes LC Júnior, Nascimento LC, Lima RA. Fatigue in children and adolescents  
32 with cancer from the perspective of health professionals. *Rev Lat Am Enferm.* 2016;24:e2784.  
33
- 34 16. Bomfim EO, Anatriello E, Nunes MDR, *et al.* Correlations between functional Interleukin-1  
35 and changes in fatigue and quality of life in children and adolescents with cancer. *J Clin Oncol.*  
36 2015;33:29\_suppl,95–95.  
37
- 38 17. Lopes-Júnior LC. Translational research and nursing: the lab bench to bedside. *Journal of*  
39 *Nursing UFPE On Line.* 2015;9(12). doi:10.5205/01012007.  
40
- 41 18. Spitzer P. Essay: Hospital clowns-modern-day court jesters at work. *The Lancet*  
42 2006;368:S34–S35.  
43
- 44 19. Oppenheim D, Simonds C, Hartmann O. Clowning on children's wards. *The Lancet.*  
45 1997;350:1838–1840.  
46
- 47 20. Koller D, Gryski C. The life threatened child and the life enhancing clown: towards a model  
48 of therapeutic clowning. *Evid Based Complement Alternat Med* 2008;5:17–25.  
49
- 50 21. Sridharan K, Sivaramakrishnan G. Therapeutic clowns in pediatrics: a systematic review  
51 and meta-analysis of randomized controlled trials. *Eur J Pediatr* 2016;175:1353–1360.  
52  
53  
54  
55  
56  
57  
58  
59  
60

- 1  
2  
3 22. Zhang Y, Yang Y, Lau WY, *et al.* The effectiveness of pre-operative clown intervention on  
4 psychological distress: A systematic review and meta-analysis. *J Paediatr Child Health*  
5 2017;53:237–245.  
6  
7  
8 23. Dionigi, A. Healthcare clowning: use of specific complementary and alternative medicine  
9 for hospitalized children. *OBM Integr Complement Med* 2018;3(2).  
10  
11 24. Bekinschtein TA, Davis MH, Rodd JM, *et al.* Why clowns taste funny: the relationship  
12 between humor and semantic ambiguity. *J Neurosci.* 2011;31:9665–9671.  
13  
14 25. Bennett MP, Lengacher C. Humor and laughter may influence health IV. Humor and  
15 immune function. *Evid Based Complement Alternat Med.* 2009;6:159–164.  
16  
17 26. Stuber M, Hilber S, Mintzer LL, *et al.* Laughter, humor and pain perception in children: a  
18 pilot study. *Evid Based Complement Alternat Med.* 2009;6:271–276.  
19  
20 27. Dionigi A, Sangiorgi D, Flangini R. Clown intervention to reduce preoperative anxiety in  
21 children and parents: a randomized controlled trial. *J Health Psychol.* 2014;19:369–380.  
22  
23 28. Vagnoli L, Caprilli S, Robiglio A, *et al.* Clown doctors as a treatment for preoperative  
24 anxiety in children: a randomized, prospective study. *Pediatrics* 2005;116:e563–e567.  
25  
26 29. Vagnoli L, Caprilli S, Messeri A. Parental presence, clowns or sedative premedication to  
27 treat preoperative anxiety in children: what could be the most promising option? *Paediatr*  
28 *Anaesth* 2010;20:937–943.  
29  
30 30. Dionigi A, Gremigni P. A combined intervention of art therapy and clown visits to reduce  
31 preoperative anxiety in children. *J Clin Nurs* 2017;26:632–640.  
32  
33 31. Bertini M, Isola E, Paolone G, *et al.* Clowns benefit children hospitalized for respiratory  
34 pathologies. *Evid Based Complement Alternat Med.* 2011:879125.  
35  
36 32. Meiri N, Ankri A, Hamad-Saied M, *et al.* The effect of medical clowning on reducing pain,  
37 crying, and anxiety in children aged 2–10 years old undergoing venous blood drawing—a  
38 randomized controlled study. *Eur J Pediatr* 2016;75:373–379.  
39  
40 33. Saliba FG, Adiwardana NS, Uehara EU, *et al.* Salivary cortisol levels: the importance of  
41 clown doctors to reduce stress. *Pediatr Rep* 2016;8:6188.  
42  
43 34. Sánchez JC, Echeverri LF, Londoño MJ, *et al.* Effects of a Humor Therapy Program on  
44 Stress Levels in Pediatric Inpatients. *Hosp Pediatr* 2017;7:46–53.  
45  
46 35. Lopes-Júnior LC, Pereira-da-Silva G, Silveira DSC, *et al.* The Effect of Clown Intervention  
47 on Self-Report and Biomarker Measures of Stress and Fatigue in Pediatric Osteosarcoma  
48 Inpatients: A Pilot Study. *Integr Cancer Ther.* 2018;17:928–940.  
49  
50 36. Lopes-Júnior LC, Silveira DSC, Olson K, *et al.* Clown intervention on psychological stress  
51 and fatigue in pediatric patients with cancer undergoing chemotherapy. *Cancer Nurs* 2018;42  
52 [Ahead of print].  
53  
54  
55  
56  
57  
58  
59  
60



- 1  
2  
3 37. Sterne JA, Hernán MA, Reeves BC, *et al.* ROBINS-I: a tool for assessing risk of bias in  
4 non-randomised studies of interventions. *BMJ* 2016;355:i4919.  
5  
6 38. Moher D, Shamseer L, Clarke M, *et al.* Preferred reporting items for systematic review and  
7 meta-analysis protocols (PRISMA-P) 2015 statement. *Syst Rev* 2015;4:1.  
8  
9 39. Higgins JPT, Green S, editors. Chapter 5: Defining the review question and developing  
10 criteria for including studies. *Cochrane Handbook of Systematic Reviews*. Version 5.0.1. The  
11 Cochrane Collaboration. 2008. Accessed February 5, 2013.  
12  
13 40. Lefebvre C, Manheimer E, Glanville J. Searching for studies. In: Higgins JPT, Greene S,  
14 eds. *Cochrane Handbook for Systematic Reviews of Interventions*, Version 5.0. 2008.  
15  
16 41. Dong ST, Butow PN, Costa DS, Lovell MR, Agar M. Symptom clusters in patients with  
17 advanced cancer: a systematic review of observational studies. *J Pain Symptom Manage*  
18 2014;48:411–450.  
19  
20 42. Kim HJ, Abraham I, Malone P. Analytical methods and issues for symptom cluster research  
21 in oncology. *Curr Opin Support Palliat Care* 2013;7:45–53.  
22  
23 43. Aktas A, Kirkova J, Walsh D, *et al.* The psychometric properties of cancer multi-symptom  
24 assessment instruments: a comprehensive review. *J Pain Symptom Manage* 2012;43:334–335  
25  
26 44. Carlos L Lopes-Júnior, Cruz LA, Leopoldo VC, Campos FR, Almeida AM, Silveira RC.  
27 Effectiveness of Traditional Chinese Acupuncture versus Sham Acupuncture: a Systematic  
28 Review. *Rev Lat Am Enferm* 2016;24:e2762.  
29  
30 45. Jadad AR, Moore RA, Carroll D, *et al.* Assessing the quality of reports of randomized  
31 clinical trials: is blinding necessary? *Control Clin Trials* 1996;7:1–12.  
32  
33 46. Higgins JPT, Green S. *Cochrane Handbook for Systematic Reviews of Interventions*. 5.1.0  
34 edition. *Cochrane Collaboration*. Chichester, UK: John Wiley & Sons, 2016.  
35  
36 47. Cohen J. *Statistical power analysis for the behavioral sciences*, 2<sup>nd</sup> ed. Lawrence Erlbaum  
37 Associates, Hillsdale, NJ 1998.  
38  
39 48. Egger M, Davey Smith G, Schneider M, Minder C. Bias in meta-analysis detected by a  
40 simple, graphical test. *BMJ*. 1997;315:629–34.  
41  
42 49. Duval S, Tweedie R. Trim and fill: A simple funnel-plot-based method of testing and  
43 adjusting for publication bias in meta-analysis. *Biometrics* 2000;56:455–63.  
44  
45 50. Silagy CA, Middleton P, Hopewell S. Publishing protocols of systematic reviews:  
46 comparing what was done to what was planned. *JAMA* 2002;287:2831–4.  
47  
48  
49  
50  
51  
52  
53  
54  
55  
56  
57  
58  
59  
60



# Reporting checklist for protocol of a systematic review.

Based on the PRISMA-P guidelines.

## Instructions to authors

Complete this checklist by entering the page numbers from your manuscript where readers will find each of the items listed below.

Your article may not currently address all the items on the checklist. Please modify your text to include the missing information. If you are certain that an item does not apply, please write "n/a" and provide a short explanation.

Upload your completed checklist as an extra file when you submit to a journal.

In your methods section, say that you used the PRISMA-P reporting guidelines, and cite them as:

Moher D, Shamseer L, Clarke M, Ghersi D, Liberati A, Petticrew M, Shekelle P, Stewart LA. Preferred Reporting Items for Systematic Review and Meta-Analysis Protocols (PRISMA-P) 2015 statement. *Syst Rev.* 2015;4(1):1.

|                |     | Reporting Item                                                                                                                                                              | Page Number |
|----------------|-----|-----------------------------------------------------------------------------------------------------------------------------------------------------------------------------|-------------|
| Identification | #1a | Identify the report as a protocol of a systematic review                                                                                                                    | 1           |
| Update         | #1b | If the protocol is for an update of a previous systematic review, identify as such                                                                                          | n/a         |
|                | #2  | If registered, provide the name of the registry (such as PROSPERO) and registration number                                                                                  | 2           |
| Contact        | #3a | Provide name, institutional affiliation, e-mail address of all protocol authors; provide physical mailing address of corresponding author                                   | 1           |
| Contribution   | #3b | Describe contributions of protocol authors and identify the guarantor of the review                                                                                         | 1           |
|                | #4  | If the protocol represents an amendment of a previously completed or published protocol, identify as such and list changes; otherwise, state plan for documenting important | n/a         |

protocol amendments

|    |                      |      |                                                                   |         |
|----|----------------------|------|-------------------------------------------------------------------|---------|
| 1  |                      |      |                                                                   |         |
| 2  |                      |      |                                                                   |         |
| 3  | Sources              | #5a  | Indicate sources of financial or other support for the review     | 1       |
| 4  |                      |      |                                                                   |         |
| 5  | Sponsor              | #5b  | Provide name for the review funder and / or sponsor               | 1       |
| 6  |                      |      |                                                                   |         |
| 7  | Role of sponsor or   | #5c  | Describe roles of funder(s), sponsor(s), and / or institution(s), | 1       |
| 8  | funder               |      | if any, in developing the protocol                                |         |
| 9  |                      |      |                                                                   |         |
| 10 |                      |      |                                                                   |         |
| 11 | Rationale            | #6   | Describe the rationale for the review in the context of what is   | 3       |
| 12 |                      |      | already known                                                     |         |
| 13 |                      |      |                                                                   |         |
| 14 |                      |      |                                                                   |         |
| 15 | Objectives           | #7   | Provide an explicit statement of the question(s) the review will  | 4 and 5 |
| 16 |                      |      | address with reference to participants, interventions,            |         |
| 17 |                      |      | comparators, and outcomes (PICO)                                  |         |
| 18 |                      |      |                                                                   |         |
| 19 |                      |      |                                                                   |         |
| 20 | Eligibility criteria | #8   | Specify the study characteristics (such as PICO, study design,    | 5       |
| 21 |                      |      | setting, time frame) and report characteristics (such as years    |         |
| 22 |                      |      | considered, language, publication status) to be used as           |         |
| 23 |                      |      | criteria for eligibility for the review                           |         |
| 24 |                      |      |                                                                   |         |
| 25 |                      |      |                                                                   |         |
| 26 |                      |      |                                                                   |         |
| 27 | Information          | #9   | Describe all intended information sources (such as electronic     | 4 and 5 |
| 28 | sources              |      | databases, contact with study authors, trial registers or other   |         |
| 29 |                      |      | grey literature sources) with planned dates of coverage           |         |
| 30 |                      |      |                                                                   |         |
| 31 |                      |      |                                                                   |         |
| 32 | Search strategy      | #10  | Present draft of search strategy to be used for at least one      | 4       |
| 33 |                      |      | electronic database, including planned limits, such that it       |         |
| 34 |                      |      | could be repeated                                                 |         |
| 35 |                      |      |                                                                   |         |
| 36 |                      |      |                                                                   |         |
| 37 | Study records -      | #11a | Describe the mechanism(s) that will be used to manage             | 4       |
| 38 | data management      |      | records and data throughout the review                            |         |
| 39 |                      |      |                                                                   |         |
| 40 |                      |      |                                                                   |         |
| 41 | Study records -      | #11b | State the process that will be used for selecting studies (such   | 4       |
| 42 | selection process    |      | as two independent reviewers) through each phase of the           |         |
| 43 |                      |      | review (that is, screening, eligibility and inclusion in meta-    |         |
| 44 |                      |      | analysis)                                                         |         |
| 45 |                      |      |                                                                   |         |
| 46 |                      |      |                                                                   |         |
| 47 |                      |      |                                                                   |         |
| 48 | Study records -      | #11c | Describe planned method of extracting data from reports           | 4 and 5 |
| 49 | data collection      |      | (such as piloting forms, done independently, in duplicate), any   |         |
| 50 | process              |      | processes for obtaining and confirming data from investigators    |         |
| 51 |                      |      |                                                                   |         |
| 52 |                      |      |                                                                   |         |
| 53 | Data items           | #12  | List and define all variables for which data will be sought       | 5       |
| 54 |                      |      | (such as PICO items, funding sources), any pre-planned data       |         |
| 55 |                      |      | assumptions and simplifications                                   |         |
| 56 |                      |      |                                                                   |         |
| 57 |                      |      |                                                                   |         |
| 58 |                      |      |                                                                   |         |
| 59 |                      |      |                                                                   |         |
| 60 |                      |      |                                                                   |         |

|    |                    |      |                                                                                 |         |
|----|--------------------|------|---------------------------------------------------------------------------------|---------|
| 1  | Outcomes and       | #13  | List and define all outcomes for which data will be sought,                     | 5       |
| 2  | prioritization     |      | including prioritization of main and additional outcomes, with                  |         |
| 3  |                    |      | rationale                                                                       |         |
| 4  |                    |      |                                                                                 |         |
| 5  |                    |      |                                                                                 |         |
| 6  | Risk of bias in    | #14  | Describe anticipated methods for assessing risk of bias of                      | 6       |
| 7  | individual studies |      | individual studies, including whether this will be done at the                  |         |
| 8  |                    |      | outcome or study level, or both; state how this information will                |         |
| 9  |                    |      | be used in data synthesis                                                       |         |
| 10 |                    |      |                                                                                 |         |
| 11 |                    |      |                                                                                 |         |
| 12 |                    |      |                                                                                 |         |
| 13 | Data synthesis     | #15a | Describe criteria under which study data will be quantitatively                 | 7       |
| 14 |                    |      | synthesised                                                                     |         |
| 15 |                    |      |                                                                                 |         |
| 16 |                    |      |                                                                                 |         |
| 17 |                    | #15b | If data are appropriate for quantitative synthesis, describe                    | 7       |
| 18 |                    |      | planned summary measures, methods of handling data and                          |         |
| 19 |                    |      | methods of combining data from studies, including any                           |         |
| 20 |                    |      | planned exploration of consistency (such as I <sup>2</sup> , Kendall's $\tau$ ) |         |
| 21 |                    |      |                                                                                 |         |
| 22 |                    |      |                                                                                 |         |
| 23 |                    |      |                                                                                 |         |
| 24 |                    | #15c | Describe any proposed additional analyses (such as                              | 7       |
| 25 |                    |      | sensitivity or subgroup analyses, meta-regression)                              |         |
| 26 |                    |      |                                                                                 |         |
| 27 |                    |      |                                                                                 |         |
| 28 |                    | #15d | If quantitative synthesis is not appropriate, describe the type                 | 7       |
| 29 |                    |      | of summary planned                                                              |         |
| 30 |                    |      |                                                                                 |         |
| 31 | Meta-bias(es)      | #16  | Specify any planned assessment of meta-bias(es) (such as                        | n/a     |
| 32 |                    |      | publication bias across studies, selective reporting within                     |         |
| 33 |                    |      | studies)                                                                        |         |
| 34 |                    |      |                                                                                 |         |
| 35 |                    |      |                                                                                 |         |
| 36 |                    |      |                                                                                 |         |
| 37 | Confidence in      | #17  | Describe how the strength of the body of evidence will be                       | 7 and 8 |
| 38 | cumulative         |      | assessed (such as GRADE)                                                        |         |
| 39 | evidence           |      |                                                                                 |         |
| 40 |                    |      |                                                                                 |         |
| 41 |                    |      |                                                                                 |         |

42 The PRISMA-P checklist is distributed under the terms of the Creative Commons Attribution License  
 43 CC-BY 4.0. This checklist was completed on 06. September 2018 using <http://www.goodreports.org/>,  
 44 a tool made by the [EQUATOR Network](#) in collaboration with [Penelope.ai](#)  
 45  
 46  
 47  
 48  
 49  
 50  
 51  
 52  
 53  
 54  
 55  
 56  
 57  
 58  
 59  
 60
